# Supplementary material
Source: Springer Nature journal article supplement (https://www.springermedizin.de/resource/supplementary/12913_2009_1217_MOESM2_ESM.pdf/9528420)

Papers identified through literature search (n=75)

Excluded as a study specific measure of stigma was used and insufficient information was presented to include in review (n=12)

Excluded as a measure of the stigma of help seeking was used which did not directly address the stigma of mental illness (n=2)

Excluded as a qualitative measure, the exploratory model interview catalogue (EMIC) was the only stigma measure used (n=2)

Excluded as an experimental measure of stigma, was the only stigma measure used (n=1)

Excluded as a generic measure of disability was the only stigma measure used (n=1)

Papers included in review (n=57)

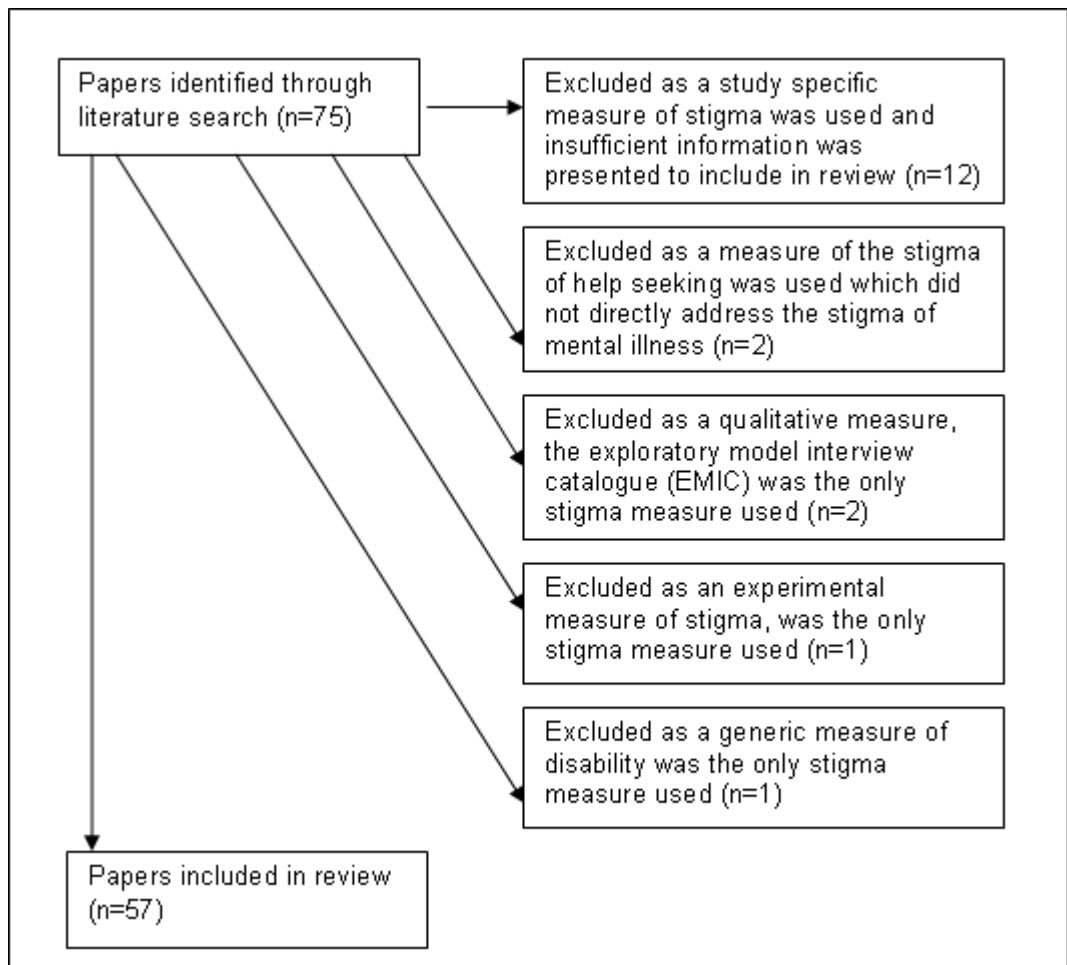

Supplement: MOESM2 [file 9528420]
